# Supplementary material
Source: publisher site journal article supplement (https://www.dovepress.com/article/604753)
Supplement: Supplementary file 1 [file 604753%20Supplementary%20Material.pdf]

Supplementary table 1: Routine hematological parameters of SD rats after 7 days of administration of different formulations

| Num | Group            | WBC<br>(10 <sup>9</sup> /L) | Neu<br>(10 <sup>9</sup> /L) | Lym<br>(10 <sup>9</sup> /L) | Mon<br>(10 <sup>9</sup> /L) | Eos<br>(10 <sup>9</sup> /L) | Bas<br>(10 <sup>9</sup> /L) | Neu<br>(%) | Lym<br>(%) | Mon<br>(%) | Eos<br>(%) | Bas<br>(%) | RBC<br>(10 <sup>12</sup> /L) | HGB<br>(g/L) | HCT<br>(%) | MCV<br>(fL) | MCH<br>(pg) | MCHC<br>(g/L) | RDW-CV<br>(%) | RDW-SD<br>(fL) | PLT<br>(10 <sup>9</sup> /L) | MPV<br>(fL) | PDW<br>(%) | PCT<br>(%) |
|-----|------------------|-----------------------------|-----------------------------|-----------------------------|-----------------------------|-----------------------------|-----------------------------|------------|------------|------------|------------|------------|------------------------------|--------------|------------|-------------|-------------|---------------|---------------|----------------|-----------------------------|-------------|------------|------------|
| 1   | Blank            | 7.37                        | 0.49                        | 4.04                        | 0.13                        | 0.01                        | 0.00                        | 13.30      | 75.50      | 9.90       | 1.30       | 0.00       | 6.25                         | 141.00       | 38.40      | 61.40       | 22.60       | 368.00        | 13.50         | 33.50          | 1067.00                     | 6.60        | 15.40      | 0.71       |
| 2   |                  | 6.34                        | 0.73                        | 4.98                        | 0.53                        | 0.01                        | 0.03                        | 15.10      | 57.00      | 1.60       | 0.90       | 0.01       | 9.12                         | 156.00       | 37.40      | 57.20       | 18.30       | 345.00        | 10.50         | 29.10          | 897.00                      | 4.20        | 19.10      | 0.35       |
| 3   |                  | 7.18                        | 2.14                        | 10.50                       | 1.11                        | 0.16                        | 0.00                        | 21.80      | 66.30      | 7.00       | 2.10       | 0.00       | 8.11                         | 162.00       | 44.30      | 50.10       | 18.30       | 339.00        | 14.10         | 38.60          | 1105.00                     | 6.40        | 13.50      | 0.41       |
| 4   | Met-CDs<br>@P407 | 5.32                        | 1.23                        | 3.57                        | 0.48                        | 0.04                        | 0.00                        | 23.10      | 67.10      | 9.10       | 0.70       | 0.00       | 7.71                         | 171.00       | 46.30      | 60.10       | 22.10       | 369.00        | 13.70         | 33.50          | 1033.00                     | 6.50        | 15.50      | 0.67       |
| 5   |                  | 5.83                        | 2.53                        | 11.50                       | 0.39                        | 0.12                        | 0.00                        | 20.00      | 83.10      | 3.50       | 0.60       | 0.00       | 5.79                         | 149.00       | 49.50      | 62.70       | 20.20       | 329.00        | 15.50         | 42.10          | 1058.00                     | 8.20        | 11.50      | 0.44       |
| 6   |                  | 8.13                        | 2.01                        | 8.63                        | 0.51                        | 0.31                        | 0.02                        | 7.10       | 68.00      | 2.40       | 0.10       | 0.00       | 8.58                         | 173.00       | 38.40      | 57.90       | 19.30       | 351.00        | 13.20         | 23.50          | 766.00                      | 8.40        | 15.30      | 0.61       |
| 7   | Met@P407         | 5.01                        | 0.34                        | 4.50                        | 0.17                        | 0.00                        | 0.00                        | 6.60       | 89.90      | 3.50       | 0.00       | 0.00       | 6.78                         | 152.00       | 41.00      | 60.50       | 22.40       | 370.00        | 14.00         | 34.40          | 1260.00                     | 6.20        | 15.40      | 0.79       |
| 8   |                  | 7.16                        | 1.85                        | 7.49                        | 0.25                        | 0.01                        | 0.02                        | 11.40      | 72.10      | 5.70       | 0.40       | 0.01       | 7.85                         | 156.00       | 50.10      | 53.40       | 20.10       | 308.00        | 17.60         | 38.40          | 1049.00                     | 6.30        | 15.90      | 0.59       |
| 9   |                  | 6.09                        | 2.07                        | 6.37                        | 0.77                        | 0.21                        | 0.01                        | 15.60      | 75.10      | 8.10       | 3.10       | 0.02       | 5.92                         | 167.00       | 48.20      | 55.50       | 20.80       | 342.00        | 11.50         | 32.60          | 1360.00                     | 8.10        | 13.50      | 0.64       |
| 10  | Mino-<br>cycline | 3.73                        | 0.33                        | 3.31                        | 0.08                        | 0.01                        | 0.00                        | 8.60       | 88.80      | 2.30       | 0.30       | 0.00       | 7.01                         | 156.00       | 42.10      | 60.00       | 22.30       | 372.00        | 14.00         | 34.10          | 1278.00                     | 5.90        | 15.20      | 0.76       |
| 11  |                  | 10.20                       | 1.19                        | 10.01                       | 1.20                        | 0.07                        | 0.00                        | 10.00      | 66.30      | 5.10       | 2.10       | 0.01       | 8.51                         | 149.00       | 47.60      | 49.80       | 19.80       | 320.00        | 15.20         | 29.30          | 1152.00                     | 7.90        | 14.80      | 0.63       |
| 12  |                  | 7.19                        | 1.53                        | 9.63                        | 0.62                        | 0.10                        | 0.02                        | 21.00      | 68.10      | 1.40       | 1.80       | 0.00       | 7.63                         | 160.00       | 39.80      | 57.60       | 19.30       | 351.00        | 16.10         | 34.20          | 1099.00                     | 6.60        | 16.40      | 0.59       |

Abbreviations: Date, sampling date; Num, rat identification number; Group, experimental grouping; WBC, white blood cell count; Neu, absolute neutrophil count; Lym, absolute lymphocyte count; Mon, absolute monocyte count; Eos, absolute eosinophil count; Bas, absolute basophil count; Neu, neutrophil percentage; Lym, lymphocyte percentage; Mon, monocyte percentage; Eos, eosinophil percentage; Bas, basophil percentage; RBC, red blood cell count; HGB, hemoglobin; HCT, hematocrit; MCV, mean corpuscular volume; MCH, mean corpuscular hemoglobin; MCHC, mean corpuscular hemoglobin concentration; RDW-CV, red blood cell distribution width-coefficient of variation; RDW-SD, red blood cell distribution width-standard deviation; PLT, platelet count; MPV, mean platelet volume; PDW, platelet distribution width; PCT, plateletcrit.

Supplementary table 2: Serum biochemical parameters related to liver and kidney function in SD rats after 7 days of administration of different formulations

| Num | Group            | AST<br>(U/L) | LDH<br>(U/L) | CK<br>(U/L) | ALT<br>(U/L) | GGT<br>(U/L) | ALP<br>(U/L) | TBIL<br>( $\mu$ mol/L) | DBIL<br>( $\mu$ mol/L) | ALB<br>(g/L) | BUN<br>(mmol/L) | CRE2<br>( $\mu$ mol/L) |
|-----|------------------|--------------|--------------|-------------|--------------|--------------|--------------|------------------------|------------------------|--------------|-----------------|------------------------|
| 1   | Blank            | 101.9        | 820          | 1481        | 32           | 3            | 242          | 2.0                    | 0.8                    | 13.0         | 3.86            | 25                     |
| 2   |                  | 59.8         | 753          | 416         | 38           | 4            | 305          | 4.0                    | 1.4                    | 18.0         | 4.52            | 22                     |
| 3   |                  | 157.3        | 496          | 591         | 51           | 2            | 79           | 2.5                    | 2.3                    | 11.5         | 8.10            | 31                     |
| 4   | Met-CDs<br>@P407 | 194          | 1318         | 1219        | 65           | 2            | 389          | 2.0                    | 0.8                    | 10.7         | 7.47            | 27                     |
| 5   |                  | 114.6        | 588          | 958         | 19           | 2            | 158          | 3.1                    | 2.2                    | 15.2         | 5.37            | 29                     |
| 6   |                  | 152.3        | 719          | 1068        | 52           | 2            | 259          | 0.7                    | 0.8                    | 9.8          | 6.19            | 38                     |
| 7   | Met@P407         | 219.8        | 1493         | 631         | 59           | 1            | 350          | 2.1                    | 0.7                    | 12.4         | 11.00           | 24                     |
| 8   |                  | 108.6        | 1029         | 1152        | 44           | 5            | 152          | 2.5                    | 1.0                    | 15.2         | 5.50            | 29                     |
| 9   |                  | 180.0        | 805          | 1319        | 34           | 2            | 231          | 3.0                    | 1.5                    | 13.5         | 8.10            | 35                     |
| 10  | Mino-<br>cycline | 97.6         | 1154         | 1528        | 47           | 3            | 316          | 2.2                    | 0.7                    | 13.6         | 8.60            | 25                     |
| 11  |                  | 141.3        | 1304         | 466         | 29           | 3            | 262          | 2.0                    | 1.9                    | 13.0         | 5.35            | 27                     |
| 12  |                  | 129.1        | 612          | 829         | 36           | 2            | 205          | 1.7                    | 2.1                    | 11.9         | 6.81            | 42                     |

Abbreviations: Num, rat identification number; Group, experimental grouping; AST, aspartate aminotransferase; LDH, lactate dehydrogenase; CK, creatine kinase; ALT, alanine aminotransferase; GGT, gamma-glutamyl transferase; ALP, alkaline phosphatase; TBIL, total bilirubin; DBIL, direct bilirubin; ALB, albumin; BUN, blood urea nitrogen; CRE2, creatinine.
